# Supplementary material
Source: PubMed Central journal article supplement (PMC6202310)
Supplement: mmc1.pdf [file mmc1.pdf]

**Supplemental Information**

**Mode of Action of Kanglemycin A, an Ansamycin**

**Natural Product that Is Active against**

**Rifampicin-Resistant *Mycobacterium tuberculosis***

**Hamed Mosaei, Vadim Molodtsov, Bernhard Kepplinger, John Harbottle, Christopher William Moon, Rose Elizabeth Jeeves, Lucia Ceccaroni, Yeonoh Shin, Stephanie Morton-Laing, Emma Claire Louise Marrs, Corinne Wills, William Clegg, Yulia Yuzenkova, John David Perry, Joanna Bacon, Jeff Errington, Nicholas Edward Ellis Allenby, Michael John Hall, Katsuhiko S. Murakami, and Nikolay Zenkin**

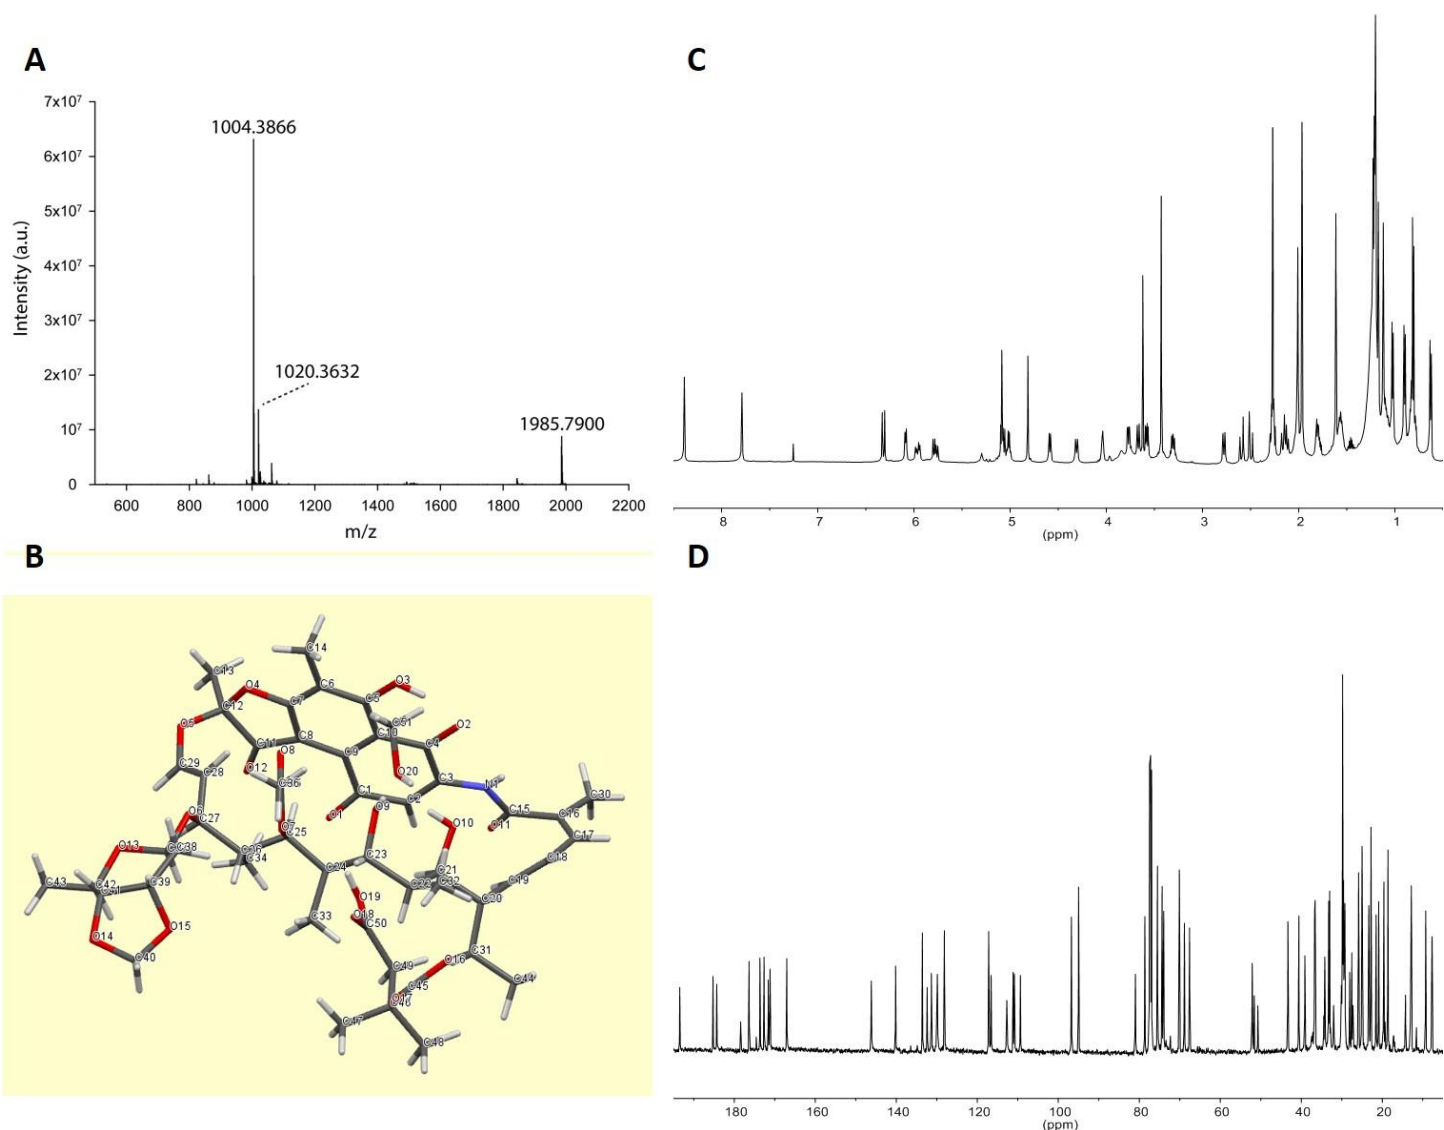

**Figure S1. Related to Fig. 1B.** **A.** Mass spectrum of KglA showing peaks at 1004.3866, 1020.3632 and 1985.7900 Da, assigned as  $[M+Na]^+$ ,  $[M+K]^+$  and  $[2M+Na]^+$  respectively. **B.** Crystallographically determined structure of KglA (from synchrotron data). Non-H atoms are labelled. **C.** 500 MHz  $^1\text{H}$  NMR spectra of KglA in  $\text{CDCl}_3$ . **D.** 125 MHz  $^{13}\text{C}\{^1\text{H}\}$  NMR spectra of KglA in  $\text{CDCl}_3$ .

**Table S1. Related to Fig. 1B.** Assignment of the  $^1\text{H}$  and  $^{13}\text{C}$  NMR data of KglA

| Atom no. | $\delta_{\text{C}}$ | $^1\text{H}$           |                  |              |           | $^{13}\text{C}-^1\text{H}$ (HMBC)                                                  |
|----------|---------------------|------------------------|------------------|--------------|-----------|------------------------------------------------------------------------------------|
|          |                     | $\delta_{\text{H}}$    | Protons          | Multiplicity | $J$ (Hz)  |                                                                                    |
| 35       | 43.1                | 2.54                   | 1                | d            | 16.8      | 1.18 (37), 1.23 (38)                                                               |
|          |                     | 2.66                   | 1                | d            | 16.8      |                                                                                    |
| 36       | 172.0               | -                      | -                | -            | -         | 2.54 (35), 2.66 (35)                                                               |
| 34       | 40.4                | -                      | -                | -            | -         | 2.54 (35), 2.66 (35), 1.18 (37), 1.23 (38)                                         |
| 38       | 24.6                | 1.23                   | 3                | s            | -         | 2.54 (35), 2.66 (35)                                                               |
| 37       | 25.7                | 1.18                   | 3                | s            | -         | 2.54 (35), 2.66 (35)                                                               |
| 33       | 176.0               | -                      | -                | -            | -         | 2.54 (35), 2.66 (35), 1.18 (37), 1.23 (38), 5.07 (31)                              |
| 31       | 67.7                | 5.07                   | 1                | "q"          | 6.4       | 3.70 (21), 1.09 (32), 5.83 (19)                                                    |
| 32       | 19.3                | 1.09                   | 3                | d            | 6.4       | 5.07 (31), 2.17 (20)                                                               |
| 20       | 52.4                | 2.17                   | 1                | "t"          | 9.7       | 5.97 (18), 5.83 (19), 5.07 (31), 3.70 (21), 3.52 (OH), 1.87 – 1.81 (22)            |
| 19       | 133.6               | 5.83                   | 1                | dd           | 15.6, 9.7 | 6.17 (17), 5.97 (18), 5.07 (31), 3.70 (21), 2.17 (20), 2.06 (30)                   |
| 18       | 127.9               | 5.97                   | 1                | dd           | 15.9, 6.2 | 5.83 (19), 2.17 (20), 2.06 (30)                                                    |
| 17       | 129.6               | 6.17                   | 1                | "dt"         | 6.2, 1.3  | 5.97 (18), 5.83 (19), 2.06 (30)                                                    |
| 16       | 132.5               | -                      | -                | -            | -         | 5.97 (18), 5.83 (19), 2.06 (30)                                                    |
| 30       | 20.5                | 2.06                   | 3                | s            | -         | 6.17 (17)                                                                          |
| 15       | 171.0               | -                      | -                | -            | -         | 8.35 (NH), 6.17 (17), 2.06 (30)                                                    |
| 21       | 68.5                | 3.70                   | 1                | d            | 10.1      | 5.83 (19), 5.07 (31), 3.52 (OH), 2.86 (23), 2.17 (20), 1.87 – 1.81 (22), 0.95 (39) |
| 22       | 33.5                | 1.87-1.81 (overlap 45) | 2 <sup>[a]</sup> | m            | -         | 2.86 (23), 2.17 (20), 0.95 (39)                                                    |
| 39       | 12.4                | 0.95                   | 3                | d            | 7.0       | 3.70 (21), 2.86 (23), 1.87 – 1.81 (22)                                             |
| 23       | 78.5                | 2.86                   | 1                | d            | 10.3      | 4.39 (25), 3.70 (21), 1.87 – 1.81 (22), 1.60 (24), 0.95 (39), 0.70 (40)            |
| 24       | 36.6                | 1.60                   | 1                | m            | -         | 2.86 (23), 0.70 (40), 4.39 (25)                                                    |
| 40       | 8.9                 | 0.70                   | 3                | d            | 6.7       | 4.39 (25), 2.86 (23), 1.60 (24)                                                    |
| 25       | 73.7                | 4.39                   | 1                | d            | 9.9       | 3.86 (27), 2.86 (23), 2.06 (30), 0.70 (40), 0.39 (43)                              |
| 41       | 173.6               | -                      | -                | -            | -         | 4.39 (25), 2.03 (42)                                                               |
| 42       | 21.3                | 2.03                   | 3                | s            | -         | -                                                                                  |
| 26       | 36.7                | 2.13-2.08              | 1                | m            | -         | 0.39 (43), 4.39 (25), 3.86 (27)                                                    |
| 43       | 12.9                | 0.39                   | 3                | d            | 7.2       | 2.13-2.08 (26)                                                                     |
| 27       | 80.9                | 3.86                   | 1                | dd           | 9.1, 3.0  | 5.14 (28), 2.13-2.08 (26)                                                          |
| 28       | 112.8               | 5.14 (overlap 47)      | 2                | dd           | 12.8, 9.1 | 3.86 (27), 6.37 (29)                                                               |
| 29       | 145.8               | 6.37                   | 1                | d            | 12.8      | 5.14 (28), 3.86 (27), 1.68 (13), 0.39 (43)                                         |
| 44       | 96.8                | 4.66                   | 1                | dd           | 8.9, 3.3  | 1.87 – 1.81 (45), 2.22 (45)                                                        |
| 49       | 70.0                | 3.37                   | 1                | "dq"         | 9.0, 6.2  | 4.87 (47), 4.66 (44), 4.11 (46), 1.28 (50)                                         |
| 48       | 75.5                | 3.63                   | 1                | dd           | 9.0, 5.2  | 5.13 (47), 4.87 (47), 3.37 (49), 2.22 (45), 1.28 (50)                              |
| 47       | 94.9                | 5.13 (overlap 28)      | 2                | "s"          | -         | 3.63 (48)                                                                          |
|          |                     | 4.87                   | 1                | "s"          | -         |                                                                                    |
| 46       | 74.3                | 4.11                   | 1                | "td"         | 4.8, 2.8  | 5.13 (47), 4.87 (47), 4.66 (44), 3.63 (48), 2.22 (45)                              |
| 45       | 33.0                | 2.22                   | 1                | "dt"         | 14.5, 2.4 | 1.87 – 1.81 (45), 4.11 (46), 4.66 (44)                                             |
|          |                     | 1.87-1.81 (overlap 22) | 2 <sup>[a]</sup> | m            | -         | 2.22 (45), 4.11 (46), 4.66 (44)                                                    |
| 50       | 18.3                | 1.28                   | 3                | d            | 6.2       | 3.37 (49)                                                                          |
| 13       | 23.1                | 1.68                   | 3                | s            | -         | 3.63 (48), 3.37 (49)                                                               |
| 12       | 109.3               | -                      | -                | -            | -         | 6.37 (29), 1.68 (13)                                                               |
| 11       | 193.5               | -                      | -                | -            | -         | 1.68 (13)                                                                          |
| 6        | 171.4               | -                      | -                | -            | -         | 2.34 (14)                                                                          |
| 14       | 7.3                 | 2.34                   | 3                | s            | -         | -                                                                                  |
| 7        | 116.4               | -                      | -                | -            | -         | 2.34 (14)                                                                          |
| 5        | 111.3               | -                      | -                | -            | -         | 2.34 (14)                                                                          |
| 8        | 166.9               | -                      | -                | -            | -         | 2.34 (14)                                                                          |
| 9        | 110.9               | -                      | -                | -            | -         | 2.34 (14)                                                                          |
| 10       | 131.5               | -                      | -                | -            | -         | 7.80 (3), 2.34 (14)                                                                |
| 1/4      | 185.3               | -                      | -                | -            | -         | 8.35 (NH), 7.80 (3)                                                                |
| 1/4      | 184.3               | -                      | -                | -            | -         | 8.34 (NH)                                                                          |
| 2        | 140.4               | -                      | -                | -            | -         | 7.80 (3)                                                                           |
| 3        | 116.7               | 7.80                   | 1                | s            | -         | 8.35 (NH)                                                                          |
| NH       | -                   | 8.35                   | 1                | -            | -         | -                                                                                  |
| Ar-OH    | -                   | 12.60                  | 1                | -            | -         | -                                                                                  |
| OH (21)  | -                   | 3.52                   | 1                | -            | -         | -                                                                                  |

<sup>[a]</sup>The integration of the signals in the 1.87 – 1.81 ppm region corresponded to 3 protons. 2 of these protons are assigned as C<sup>45</sup>-H and C<sup>22</sup>-H. It is possible that the remaining signal corresponds to an OH.

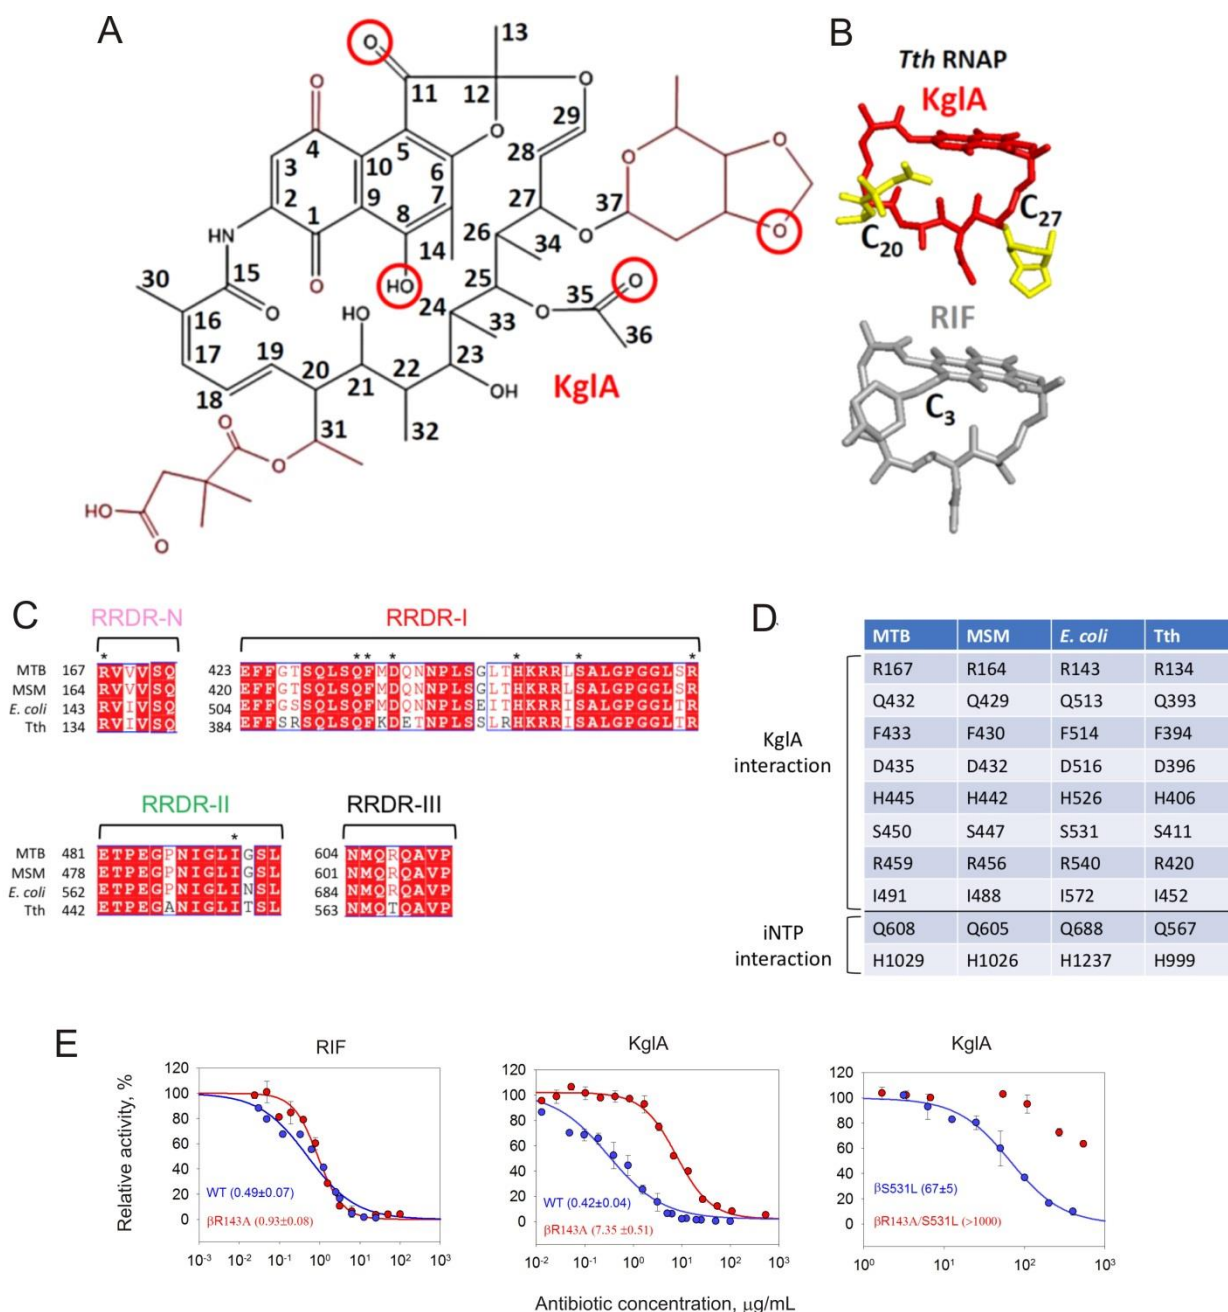

**Figure S2. Related to Fig. 2.** **A.** The chemical structure of Kanglemycin A (KglA). The four oxygen atoms forming hydrogen bonds with the RIF-binding pocket of RNAP are marked by red circles. **B.** Conformations of KglA and RIF in the RIF-binding pocket of *T. thermophilus* RNAP. KglA (red) and RIF (grey) are shown as stick models; the KglA's ansa-bridge C20 and C27 side chains are shown in yellow and labeled; the C3 side chain of RIF is labeled. **C.** Sequence alignment spanning the RIF resistance-determining regions (RRDRs) in the  $\beta$  subunit (RpoB) of RNAPs from *M. tuberculosis* H37RV (MTB), *M. smegmatis* (MSM), *E. coli* and *T. thermophilus* (Tth). Amino acid residues involved in the KglA interaction (Fig. 2) and also having mutations to generate the RIF-resistant RNAPs (Figs. 1 and 3) investigated in this study are indicated by asterisks.

**D.** Amino acid residues of the  $\beta$  subunit of RNAPs involved in the KglA and initiating NTP (iNTP) interactions. **E.** Involvement of KglA-specific interaction with  $\beta$ R143 in KglA activity. Error bars are  $\pm$ SD. The brackets contain calculated  $\text{IC}_{50} \pm \text{SE}$ .  $\text{IC}_{50}$  of KglA for double mutant was beyond our measurement limit.

**Table S2. Oligonucleotides used in the study.**

| Oligonucleotides                                                                                                                                                     |                          |     |
|----------------------------------------------------------------------------------------------------------------------------------------------------------------------|--------------------------|-----|
| D516V (GAC =>GTC)<br>rpoB_D516V_d: GCT GTC TCA GTT TAT GGT CCA GAA CAA CCC GCT G<br>rpoB_D516V_r: CAG CGG GTT GTT CTG GAC CAT AAA CTG AGA CAG C                      | This paper               | N/A |
| S531L (TCC =>TTG)<br>rpoB_S531_d: AAA CGT CGT ATC TTG GCA CTC GGC CC<br>rpoB_S531_r: GGG CCG AGT GCC AAG ATA CGA CGT TT                                              | This paper               | N/A |
| H526P (CAC =>CCG)<br>rpoB_H526Y_d: CTG AGA TTA CGC CGA AAC GTC GTA T<br>rpoB_H526Y_r: ATA CGA CGT TTC GGC GTA ATC TCA G                                              | This paper               | N/A |
| H526Y (CAC =>TAC)<br>rpoB_H526Y_d: CTG AGA TTA CGT ACA AAC GTC GTA T<br>rpoB_H526Y_r: ATA CGA CGT TTG TAC GTA ATC TCA G                                              | This paper               |     |
| I572F (ATC =>TTC)<br>rpoB_I572_d: CAT CGG TCT GTT CAA CTC TCT GTC CG<br>rpoB_I572_r: CGG ACA GAG AGT TGA ACA GAC CGA TG                                              | This paper               | N/A |
| Q513L (CAG =>CTG)<br>rpoB_Q513L_d: CCA GCC AGC TGT CTC TGT TTA TGG ACC<br>rpoB_Q513L_r: GGT CCA TAA ACA GAG ACA GCT GGC TGG                                          | This paper               | N/A |
| D516Y (GAC =>TAC)<br>rpoB_D516Y_d: GCT GTC TCA GTT TAT GTA TCA GAA CAA CCC GCT G<br>rpoB_D516Y_r: CAG CGG GTT GTT CTG ATA CAT AAA CTG AGA CAG C                      | This paper               | N/A |
| H526R (CAC =>CGC)<br>rpoB_H526R_d: CTG AGA TTA CGC GCA AAC GTC GTC G<br>rpoB_H526R_r: CGA CGA CGT TTG CGC GTA ATC TCA G                                              | This paper               | N/A |
| D516V (GAC =>GTC)<br>rpoB_D516V_d: GCT GTC TCA GTT TAT GGT CCA GAA CAA CCC GCT G<br>rpoB_D516V_r: CAG CGG GTT GTT CTG GAC CAT AAA CTG AGA CAG C                      | This paper               | N/A |
| S531L (TCC =>TTG)<br>rpoB_S531_d: AAA CGT CGT ATC TTG GCA CTC GGC CC<br>rpoB_S531_r: GGG CCG AGT GCC AAG ATA CGA CGT TT                                              | This paper               | N/A |
| H526P (CAC =>CCG)<br>rpoB_H526Y_d: CTG AGA TTA CGC CGA AAC GTC GTA T<br>rpoB_H526Y_r: ATA CGA CGT TTC GGC GTA ATC TCA G                                              | This paper               | N/A |
| H526Y (CAC =>TAC)<br>rpoB_H526Y_d: CTG AGA TTA CGT ACA AAC GTC GTA T<br>rpoB_H526Y_r: ATA CGA CGT TTG TAC GTA ATC TCA G                                              | This paper               | N/A |
| I572F (ATC =>TTC)<br>rpoB_I572F_d: CAT CGG TCT GTT CAA CTC TCT GTC CG<br>rpoB_I572F_r: CGG ACA GAG AGT TGA ACA GAC CGA TG                                            | This paper               | N/A |
| R143A (CGT=>GCT)<br>rpoB_R143A_d: TGT TAT CAA CGG TAC TGA GGC TGT TAT CGT TTC CCA<br>GCT G<br>rpoB_R143A_r: CAG CTG GGA AAC GAT AAC AGC CTC AGT ACC GTT GAT<br>AAC A | This paper               | N/A |
| <i>pyrG</i> non-template: TAT AAT GGG AGC TGG CTC TGA TGC AGG<br><i>pyrG</i> template: CCT GCA TCA GAG CCC AAA ATA C                                                 | Murakami<br>et al., 2017 | N/A |
